# Supplementary material for: Folic acid–maltodextrin polymer coated magnetic graphene oxide as a NIR-responsive nano-drug delivery system for chemo-photothermal synergistic inhibition of tumor cells
Source: Royal Society of Chemistry journal article supplement (doi:10.1039/d3ra02306k), 2023-01-01
Supplement: d3ra02306k1.pdf [file d3ra02306k1.pdf]

## Supplementary Material

### **Folic Acid-Maltodextrin Polymers Coated Magnetic Graphene Oxide as NIR-responsive Nano-drug Delivery System for Chemo-photothermal Synergistic Inhibition of Tumor Cell**

**Tao Gong,<sup>a1</sup> Xiaoyu Wang,<sup>a1</sup> Huirui Zhu,<sup>a</sup> Chaochao Wen,<sup>b</sup> Qing Ma,<sup>a</sup> Xiaoning Li,<sup>a</sup>  
Meining Li,<sup>a</sup> Rui Guo,<sup>\*a</sup> and Wenting Liang<sup>\*b</sup>**

<sup>1</sup> *These authors contribute equally*

<sup>a</sup> *Department of Biochemistry and Molecular Biology, Shanxi Medical University, Taiyuan 030001, China; 15834151276@139.com (R. G.)*

<sup>b</sup> *Institute of Environmental Science, Department of Chemistry, Shanxi University, Taiyuan 030006, China; liangwt@sxu.edu.cn (W. L.).*

## 1. Synthesis of MGO and MGO-APTES

According to our previous reported work<sup>[1]</sup>, GO nanosheets were prepared by a modified Hummer's method with natural graphite powder.  $\text{FeCl}_3 \cdot 6\text{H}_2\text{O}$  and  $\text{FeCl}_2 \cdot 4\text{H}_2\text{O}$  (mol ratio of 2:1) were dissolved into 100 mL deionized water with dispersed appropriate amount of GO nanosheets. After injection of  $\text{NH}_3 \cdot \text{H}_2\text{O}$  (25%), the reaction was kept stirring with vigorous mechanical agitation under a nitrogen environment for 4 h at 80 °C to yield magnetic black precipitate. The mixture was magnetically separated and washed with DI water and anhydrous ethanol three times, and freeze-dried overnight for further use.

The obtained MGO powder (200 mg) was dispersed in ethanol (200 mL, 99.5%) by ultrasonic. APTES (300  $\mu\text{L}$ ) was added to the mixture with a mechanical agitation for 8 h at room temperature under  $\text{N}_2$  protection. The precipitate was magnetically separated and washed with ethanol and deionized water three times. Finally, it was freeze-dried for 24 h to get amino-MGO.

## 2. Lagergren's pseudo-first-order kinetic model (Eq (1)) and Ho's pseudo-second-order model (Eq (2))

$$\ln(q_e - q_t) = \ln(q_e) - k_1 t, \quad (1)$$

$$\frac{t}{q_t} = \frac{1}{k_2 q_e^2} + \frac{t}{q_e}, \quad (2)$$

where, in equation (1) and (2):  $q_e$  (mg/g) is equilibrium adsorption capacity;  $q_t$  (mg/g) is the drug loading at different time points;  $t$  (min) is the drug loading time;  $k_1$  and  $k_2$  are kinetic constants.

### 3. Langmuir model (Equ (3)) and Freundlich model (Equ (4))

$$\frac{C_e}{q_e} = \frac{C_e}{q_m} + \frac{1}{q_m K_L}, \quad (3)$$

$$\ln q_e = \ln K_f + \frac{1}{n} \ln C_e, \quad (4)$$

where, in equation (3) and (4):  $C_e$  (mg/L) is the mass concentration at the time of drug loading equilibrium;  $q_m$  (mg/g) is the drug load in the saturated state;  $q_e$  (mg/g) is the drug load at equilibrium;  $K_L$  (L/mg) is the dissociation constant;  $K_f$  is the Freundlich constant;  $1/n$  is the Freundlich component factor.

### Reference

- [1] Liang W, Huang Y, Lu D, et al.  $\beta$ -Cyclodextrin-Hyaluronic Acid Polymer Functionalized Magnetic Graphene Oxide Nanocomposites for Targeted Photo-Chemotherapy of Tumor Cells, *Polymers*. (2019), 11(1): 133.

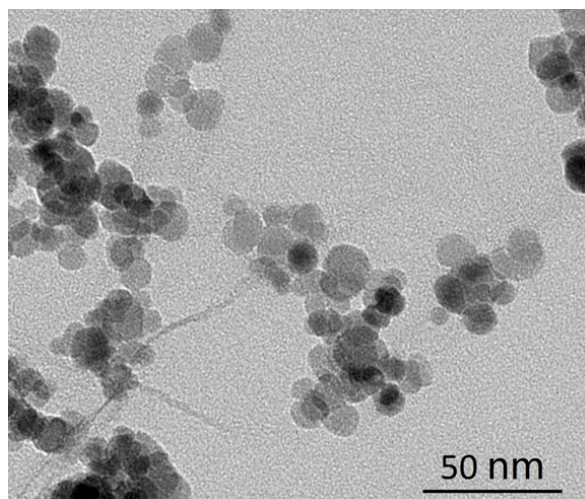

**Figure S1.** TEM images of MGO.

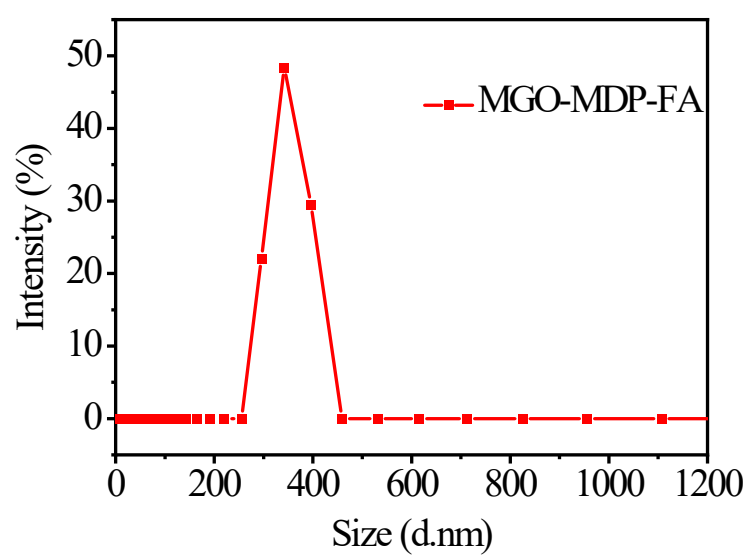

**Figure S2.** Size distribution of MGO-MDP-FA measured by DLS.

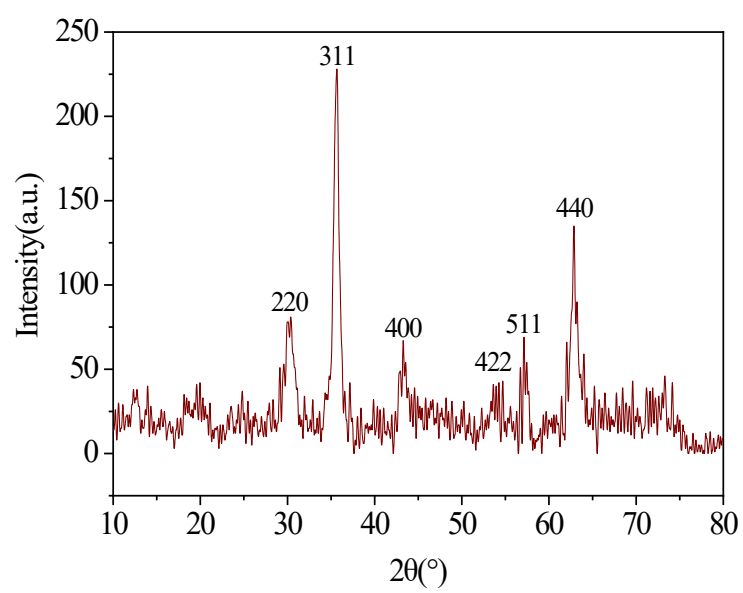

**Figure S3.** XRD of MGO.

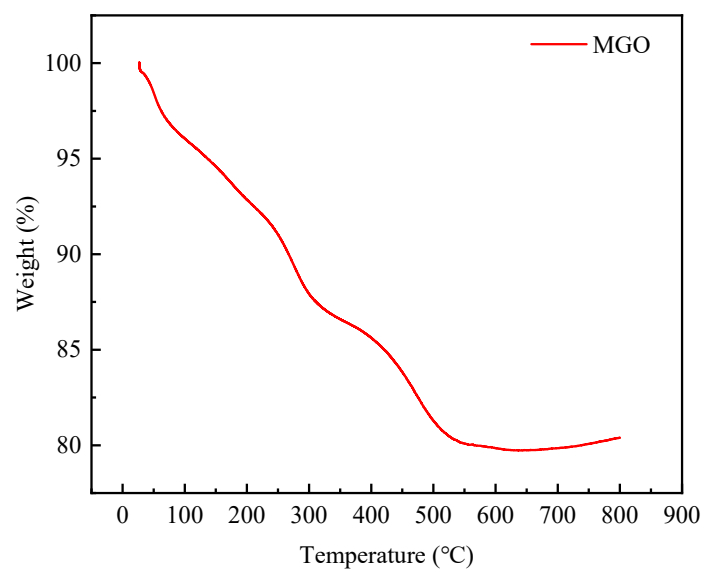

**Figure S4.** TGA curves of MGO in air.

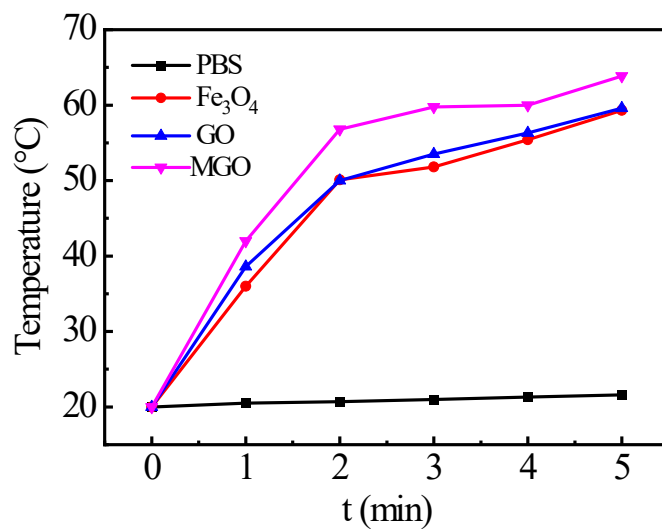

**Figure S5.** Temperature change curves of Fe<sub>3</sub>O<sub>4</sub>, GO and MGO solution with the concentration of 1.0 mg mL<sup>-1</sup> under NIR laser irradiation (808 nm, 2.0 W cm<sup>-2</sup>) for 0-5 min recorded by the thermal camera.

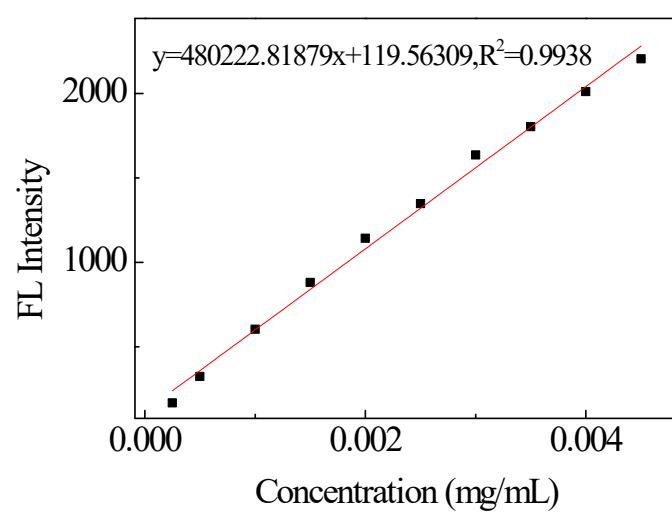

**Figure S6.** Plot of calibration curves for DOX solution with different concentration.

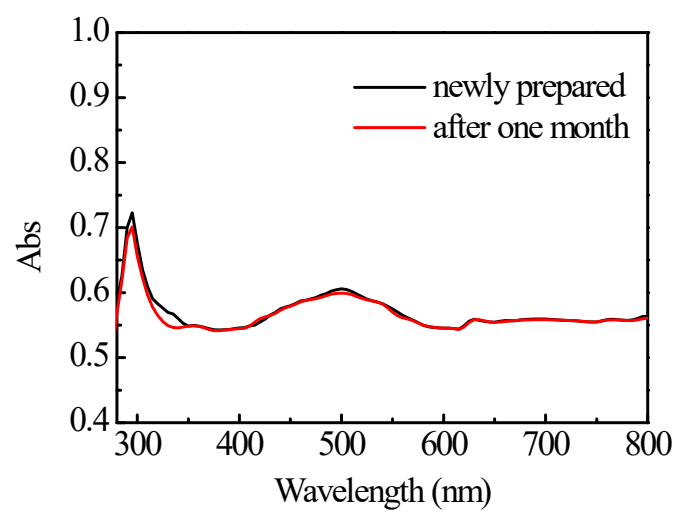

**Figure S7.** UV-Vis spectra of newly prepared MGO-MDP-FA@DOX aqueous solution placed for one month.

**Table S1.** The drug adsorption kinetic parameters for DOX on MGO-MDP-FA corresponded with Lagergren's pseudo-first-order model and Ho's pseudo-second-order model

| Lagergren's pseudo-first-order kinetic model |                    |        | Ho's pseudo-second-order kinetic model |                                |        |
|----------------------------------------------|--------------------|--------|----------------------------------------|--------------------------------|--------|
| $q_e$ (mg/g)                                 | $k_1$ ( $h^{-1}$ ) | $R^2$  | $q_e$ (mg/g)                           | $k_2$ ( $g(mg \cdot h)^{-1}$ ) | $R^2$  |
| 2.701                                        | 0.00434            | 0.9113 | 33.85                                  | 0.005788                       | 0.9999 |

**Table S2.** Relevant parameters of Langmuir isotherm and Freundlich isotherm adsorption models for DOX by MGO-MDP-FA

| Langmuir isotherm Model |               |        | Freundlich isotherm Model |              |        |
|-------------------------|---------------|--------|---------------------------|--------------|--------|
| $q_m$ (mg/g)            | $K_L$ (mg/mL) | $R^2$  | $n$                       | $K_f$ (mL/g) | $R^2$  |
| 657.9                   | 0.2603        | 0.9983 | 3.295                     | 192.9        | 0.9222 |
